# Supplementary material for: Measurement of Exhaled Volatile Organic Compounds as a Biomarker for Personalised Medicine: Assessment of Short-Term Repeatability in Severe Asthma
Source: MDPI journal article supplement (doi:10.3390/jpm12101635), 2022-10-02
Supplement: s1 [file s1]

## Supplementary Table S1

Principal Component Loadings for the first 10 Principal Components. Principal Components (PC)

| ID                                         | PC1      | PC2      | PC3      | PC4      | PC5      | PC6      | PC7      | PC8      | PC9      | PC10     |
|--------------------------------------------|----------|----------|----------|----------|----------|----------|----------|----------|----------|----------|
| Butane, 2-methyl-                          | -0.07926 | 0.009723 | 0.113709 | 0.03363  | -0.14753 | 0.066121 | -0.06074 | 0.306388 | -0.22803 | 0.408603 |
| Sevoflurane                                | -0.03944 | 0.096948 | 0.047568 | 0.017491 | 0.177325 | -0.10126 | -0.06109 | 0.089542 | -0.12718 | -0.11868 |
| Trichloromonofluoromethane                 | -0.07826 | 0.135891 | -0.07545 | -0.03723 | 0.119888 | -0.18485 | -0.16184 | 0.070488 | -0.01489 | 0.422441 |
| Pentane                                    | -0.06622 | 0.056339 | 0.132765 | -0.05799 | -0.03544 | -0.04205 | -0.16697 | 0.215808 | -0.09865 | 0.235983 |
| Dimethyl selenide                          | 0.08843  | 0.063819 | 0.259308 | -0.13825 | -0.11966 | -0.06366 | -0.06445 | -0.10034 | -0.24362 | -0.11449 |
| Methacrolein                               | -0.03398 | 0.029706 | 0.096891 | -0.24538 | -0.06273 | -0.14844 | -0.02906 | -0.08444 | -0.13214 | -0.0685  |
| Furan, 2-methyl-                           | -0.02433 | 0.020357 | 0.116907 | -0.28238 | -0.09206 | -0.20648 | -0.03101 | -0.05565 | -0.03128 | -0.03945 |
| 2-Butanone                                 | -0.03511 | 0.025004 | 0.059132 | -0.05413 | 0.002399 | -0.04601 | -0.05478 | 0.000954 | -0.00938 | 0.022043 |
| 1,3,5-Trifluorobenzene                     | -0.07933 | 0.102564 | -0.15035 | -0.15579 | 0.009297 | -0.08676 | -0.11944 | 0.040786 | 0.081934 | -0.0169  |
| Trichloromethane                           | -0.08699 | 0.079835 | 0.078352 | -0.07649 | 0.032394 | -0.10613 | -0.3272  | 0.252132 | 0.189509 | 0.059116 |
| Benzene, 1,2-difluoro-4-(trifluoromethyl)- | -0.04536 | 0.053572 | -0.09979 | -0.14686 | -0.00319 | -0.06453 | -0.10951 | 0.028604 | 0.041106 | -0.06042 |
| Carbon Tetrachloride                       | -0.09295 | 0.291258 | -0.08948 | -0.00077 | 0.116463 | -0.15301 | -0.12837 | -0.07687 | -0.30203 | 0.055317 |
| 1,2,3-Trifluoro-4-trifluoromethylbenzene   | -0.03363 | 0.088939 | -0.07943 | -0.09861 | 0.002558 | -0.08424 | -0.08506 | 0.057149 | 0.031959 | 0.002142 |
| 2-Pentanone                                | -0.04476 | -0.02673 | 0.027708 | 0.030114 | -0.01532 | 0.08415  | 0.014815 | 0.193095 | -0.03176 | -0.10189 |

|                                                               |          |          |          |          |          |          |          |          |          |          |
|---------------------------------------------------------------|----------|----------|----------|----------|----------|----------|----------|----------|----------|----------|
| 1,4-Dioxane                                                   | -0.07846 | 0.030664 | 0.023251 | -0.19601 | -0.06573 | 0.032953 | -0.13144 | 0.145997 | -0.13398 | -0.10947 |
| 1-Propene, 1-(methylthio)-, (Z)-                              | 0.086834 | 0.148704 | 0.333556 | 0.069036 | -0.19246 | -0.11907 | 0.036657 | -0.13633 | -0.10523 | 0.044314 |
| 1-Propene, 1-(methylthio)-, (E)-                              | 0.104573 | 0.132965 | 0.38654  | 0.090414 | -0.17715 | -0.11472 | 0.035994 | -0.14981 | -0.07659 | 0.066779 |
| Octane                                                        | 0.013677 | 0.079701 | -0.04179 | 0.011512 | 0.120224 | 0.101763 | 0.238478 | 0.00333  | -0.09694 | 0.123582 |
| Tetrachloroethylene                                           | -0.03359 | -0.05944 | 0.120964 | -0.25924 | 0.091543 | 0.113873 | 0.237695 | 0.203805 | 0.375281 | 0.123236 |
| 2,3,4-Trifluorobenzoic acid, 4-nitrophenyl ester              | -0.01187 | 0.116834 | -0.1104  | -0.05706 | 0.025827 | 0.036453 | -0.09533 | -0.01532 | 0.030661 | -0.08292 |
| Hexanal                                                       | -0.06216 | 0.326353 | 0.028936 | -0.03094 | -0.02898 | 0.157488 | -0.00414 | 0.11767  | 0.045995 | -0.13264 |
| 1,1,3,3-Tetramethyl-1,3-bis[(2Z)-pent-2-en-1-yloxy]disiloxane | -0.01203 | 0.19898  | -0.09367 | 0.098975 | 0.065862 | 0.054473 | 0.247995 | 0.041656 | -0.11028 | 0.054676 |
| Cyclohexane, 1,3,5-trimethyl-                                 | 0.056186 | -0.09801 | 0.236713 | -0.05824 | 0.284991 | -0.18257 | 0.006889 | -0.0144  | 0.0504   | -0.02177 |
| Heptane, 2,3-dimethyl-                                        | -0.02758 | 0.004062 | 0.155133 | 0.09534  | 0.284509 | 0.089762 | 0.207532 | -0.10797 | -0.05772 | 0.216686 |
| Octane, 2-methyl-                                             | 0.001542 | -0.01287 | 0.17985  | -0.03063 | 0.264399 | -0.15736 | 0.078525 | 0.078117 | -0.00373 | 0.032987 |
| p-Xylene                                                      | -0.05947 | -0.03175 | 0.056693 | -0.02477 | 0.209709 | 0.042463 | -0.03732 | 0.142415 | -0.1317  | -0.09856 |
| Nonane                                                        | 0.035062 | 0.076328 | 0.279138 | -0.05612 | 0.215761 | -0.1113  | 0.107653 | 0.162563 | 0.199645 | -0.07183 |
| 4-Heptanone                                                   | -0.00193 | -0.07239 | -0.01054 | 0.023481 | 0.036702 | 0.084298 | 0.056337 | 0.227921 | -0.07643 | -0.07476 |
| o-Xylene                                                      | -0.05301 | -0.02178 | 0.034017 | -0.00394 | 0.210001 | 0.003109 | -0.08006 | 0.16597  | -0.10994 | -0.13271 |

|                                                      |          |          |          |          |          |          |          |          |          |          |
|------------------------------------------------------|----------|----------|----------|----------|----------|----------|----------|----------|----------|----------|
| 3-Methylcyclopentyl acetate                          | -0.09826 | 0.508896 | -0.16518 | 0.026833 | -0.05254 | 0.141114 | 0.004351 | -0.25176 | 0.200014 | -0.013   |
| Heptanal                                             | -0.04119 | 0.257495 | 0.060101 | -0.13137 | -0.09412 | 0.125174 | 0.19836  | 0.188629 | -0.02422 | 0.007515 |
| Bicyclo[3.1.0]hex-2-ene, 4-methyl-1-(1-methylethyl)- | 0.306851 | 0.155725 | -0.07826 | 0.017456 | 0.059506 | -0.05535 | -0.1061  | 0.063042 | 0.069441 | 0.085971 |
| ?                                                    | -0.00804 | 0.014618 | -0.08923 | -0.26934 | -0.03161 | -0.00528 | -0.16976 | -0.06115 | -0.01247 | 0.06312  |
| Camphene                                             | 0.2771   | 0.15573  | 0.199088 | 0.043658 | -0.10842 | 0.131919 | -0.04734 | -0.07999 | 0.083361 | 0.158339 |
| .beta.-Pinene                                        | 0.246921 | 0.216226 | -0.18323 | 0.100406 | 0.151296 | -0.05473 | -0.02439 | 0.08179  | 0.047066 | 0.111742 |
| Heptane, 2,2,4,6,6-pentamethyl-                      | 0.044112 | 0.209171 | 0.047627 | -0.23658 | 0.095661 | -0.21132 | 0.188729 | -0.12724 | 0.048798 | -0.15256 |
| .beta.-Myrcene                                       | 0.2847   | -0.00457 | -0.08094 | -0.06249 | 0.087352 | -0.02129 | 0.026866 | 0.136832 | -0.09049 | -0.16547 |
| Decane                                               | -0.06461 | 0.067735 | 0.07639  | -0.07462 | 0.384652 | 0.025014 | 0.05511  | -0.25928 | 0.088586 | 0.076927 |
| 3-Carene                                             | 0.137075 | 0.172371 | 0.033168 | -0.02802 | 0.047059 | -0.0048  | -0.16444 | -0.01061 | -0.13406 | -0.19014 |
| 1,3-Cyclohexadiene, 1-methyl-4-(1-methylethyl)-      | 0.353069 | -0.02419 | -0.05966 | -0.00105 | 0.010768 | 0.072761 | -0.05838 | 0.043418 | -0.1147  | -0.05644 |
| Octanal                                              | -0.06754 | 0.23593  | 0.039494 | -0.11438 | -0.07165 | 0.289939 | 0.108997 | 0.189328 | 0.003799 | -0.14024 |
| D-Limonene                                           | 0.116352 | -0.0673  | -0.13087 | -0.05131 | 0.229301 | -0.01253 | -0.19851 | -0.00251 | -0.08439 | -0.10525 |
| p-Cymene                                             | 0.316522 | 0.00072  | 0.028506 | 0.024321 | 0.13818  | 0.163118 | -0.16304 | -0.01721 | 0.133606 | 0.020679 |
| Eucalyptol                                           | 0.163398 | -0.05529 | 0.064295 | -0.16083 | -0.15631 | 0.135969 | -0.22848 | 0.045606 | 0.198788 | 0.117892 |

|                                                                         |          |          |          |          |          |          |          |          |          |          |
|-------------------------------------------------------------------------|----------|----------|----------|----------|----------|----------|----------|----------|----------|----------|
| .beta.-Ocimene                                                          | 0.153439 | 0.015468 | 0.199102 | 0.012778 | -0.09337 | 0.087101 | -0.00502 | 0.012589 | 0.079292 | -0.13951 |
| .gamma.-Terpinene                                                       | 0.255654 | 0.079303 | -0.01858 | 0.121971 | 0.12537  | 0.067257 | -0.0469  | 0.03955  | -0.00734 | 0.026562 |
| 4-Cyanocyclohexene                                                      | -0.0405  | 0.028341 | 0.132199 | -0.05469 | 0.10432  | 0.243671 | -0.08976 | 0.054135 | 0.061164 | 0.189061 |
| Octane, 1-chloro-                                                       | -0.04937 | 0.058553 | 0.079084 | -0.05425 | 0.0183   | 0.266757 | 0.034205 | 0.094956 | -0.08795 | -0.16963 |
| Cyclohexene, 1-methyl-4-(1-methylethylidene)-                           | 0.243282 | -0.02645 | 0.065519 | 0.102182 | 0.039444 | 0.119771 | -0.10766 | 0.006759 | -0.12669 | -0.00405 |
| Undecane                                                                | -0.0443  | -0.00603 | 0.126642 | -0.16876 | 0.139069 | 0.089044 | -0.10309 | -0.02824 | 0.044908 | -0.0822  |
| 3-Octanol, 3,7-dimethyl-                                                | 0.010617 | 0.062792 | -0.05469 | 0.031485 | 0.068923 | 0.014349 | 0.170108 | 0.172176 | -0.37881 | 0.032168 |
| Undecane, 3-methyl-                                                     | -0.04651 | -0.16462 | 0.097693 | -0.23282 | 0.076677 | 0.385266 | -0.08299 | -0.1913  | -0.16461 | -0.03885 |
| l-Menthone                                                              | 0.211559 | -0.08405 | -0.1236  | -0.28879 | -0.09143 | -0.06943 | 0.23996  | 0.022025 | -0.10313 | 0.104095 |
| Dodecane                                                                | -0.04994 | -0.03687 | -0.06515 | -0.25417 | 0.128177 | 0.283167 | -0.09447 | -0.3199  | -0.19671 | 0.2432   |
| Cyclohexanol, 5-methyl-2-(1-methylethyl)-, (1.alpha.,2.alpha.,5.beta.)- | 0.178743 | -0.03037 | -0.16438 | -0.2602  | -0.04286 | -0.07038 | 0.18957  | 0.038306 | -0.01113 | 0.023311 |
| Cyclohexanone, 5-methyl-2-(1-methylethyl)-, trans-                      | 0.216861 | -0.04904 | -0.12412 | -0.27753 | -0.08419 | -0.08247 | 0.206004 | 0.052114 | -0.01896 | 0.162814 |
